# Supplementary material for: Habitat Provision and Erosion Are Influenced by Seagrass Meadow Complexity: A Seascape Perspective
Source: MDPI journal article supplement (doi:10.3390/d15020125), 2023-01-17
Supplement: s1 [file s1]

## Supplementary material

**Table S1.** Environmental characteristics and aspects of the ecology of the six estuaries sampled in this study, based on [61, 122, 123]. NA – no commercial fishing in these estuaries.

|                                                                  | <b>Port Stephens</b>                            | <b>Lake Macquarie</b>                    | <b>Pittwater</b>                                | <b>Botany Bay</b>     | <b>Jervis Bay</b>      | <b>St Georges Basin</b>                  |
|------------------------------------------------------------------|-------------------------------------------------|------------------------------------------|-------------------------------------------------|-----------------------|------------------------|------------------------------------------|
| <b>Estuary group / type [61]</b>                                 | Tide-dominated estuary / drowned valley estuary | Wave-dominated estuary / barrier estuary | Tide-dominated estuary / drowned valley estuary | Bay / ocean embayment | Bay / ocean embayment  | Wave-dominated estuary / barrier estuary |
| <b>Catchment area (km<sup>2</sup>) [122]</b>                     | 296.77                                          | 604.39                                   | 50.77                                           | 54.87                 | 32.39                  | 315.75                                   |
| <b>Entrance condition [122]</b>                                  | Open                                            | Open/ Trained                            | Open                                            | Open                  | Open                   | Open                                     |
| <b>Estuary area (km<sup>2</sup>, saltmarsh excluded) [122]</b>   | 123.75                                          | 113.21                                   | 18.36                                           | 38.79                 | 122.41                 | 40.76                                    |
| <b>Area of seagrass (km<sup>2</sup>) [122]</b>                   | 12.594                                          | 14.633                                   | 1.855                                           | 5.358                 | 5.534                  | 3.170                                    |
| <b>Area of <i>Posidonia australis</i> (km<sup>2</sup>) [123]</b> | 4.097                                           | 0.991                                    | 1.245                                           | 3.151                 | 5.131                  | 1.401                                    |
| <b>average depth (m) [122]</b>                                   | 14.07                                           | 5.71                                     | 9.90                                            | 11.36                 | 16.16                  | 5.28                                     |
| <b>Estuary volume (MI) [122]</b>                                 | 1741516                                         | 646274                                   | 181836                                          | 440816                | 1977656                | 215079                                   |
| <b>Presence of Marine Park</b>                                   | Port Stephens - Great Lakes Marine Park         | no                                       | no                                              | no                    | Jervis Bay Marine Park | no                                       |
| <b>Approx distance of sampled area from the ocean (m)</b>        | 6,685                                           | 6,270                                    | 1,326                                           | 3,470                 | 7,790                  | 8,280                                    |
| <b>Annual commercial fish catch t/km<sup>2</sup> [122]</b>       | 3.27                                            | NA                                       | 1.99                                            | NA                    | 0                      | NA                                       |

**Table S2.** List of the sampling sites and variables obtained using Generalised Random Tessellation Structures (GRTS). Site 'ps7' was not included in the analyses because too deep and not representative of a seagrass habitat.

| siteID | lat      | long     | depth | area_50 | fragm_50 | area_250 | fragm_250 | area_500 | fragm_500 | dist.edge | estuary        |
|--------|----------|----------|-------|---------|----------|----------|-----------|----------|-----------|-----------|----------------|
| bb1    | -34.0074 | 151.1981 | 1.7   | 45      | 0.711111 | 157      | 0.420382  | 3545     | 0.134838  | 10        | botany_bay     |
| bb10   | -34.0066 | 151.1953 | 1.5   | 69      | 1.00E-05 | 268      | 0.30597   | 3970     | 0.137028  | 50        | botany_bay     |
| bb11   | -34.003  | 151.1968 | 4     | 10      | 2.8      | 77       | 1.532468  | 3839     | 0.256838  | 0         | botany_bay     |
| bb12   | -34.0072 | 151.1948 | 1     | 23      | 1.565217 | 134      | 0.492537  | 3605     | 0.119279  | 0         | botany_bay     |
| bb13   | -34.0047 | 151.194  | 2.5   | 69      | 1.00E-05 | 305      | 1.00E-05  | 4357     | 0.280468  | 161.2452  | botany_bay     |
| bb14   | -34.0054 | 151.1951 | 2     | 69      | 1.00E-05 | 305      | 1.00E-05  | 4274     | 0.190922  | 170.2939  | botany_bay     |
| bb15   | -34.0032 | 151.1956 | 4     | 37      | 1.189189 | 155      | 0.658065  | 3924     | 0.293578  | 0         | botany_bay     |
| bb2    | -34.0058 | 151.1934 | 1.6   | 69      | 1.00E-05 | 305      | 1.00E-05  | 3981     | 0.212007  | 111.8034  | botany_bay     |
| bb3    | -34.0048 | 151.1971 | 2.4   | 69      | 1.00E-05 | 305      | 1.00E-05  | 4391     | 0.185835  | 130.384   | botany_bay     |
| bb4    | -34.0054 | 151.1984 | 2.3   | 69      | 1.00E-05 | 305      | 1.00E-05  | 4260     | 0.161972  | 178.8854  | botany_bay     |
| bb5    | -34.0035 | 151.1945 | 3     | 69      | 1.00E-05 | 251      | 0.398406  | 4146     | 0.30439   | 44.72136  | botany_bay     |
| bb6    | -34.0061 | 151.1972 | 1.7   | 69      | 1.00E-05 | 305      | 1.00E-05  | 4170     | 0.152518  | 130.384   | botany_bay     |
| bb7    | -34.0045 | 151.1968 | 2.5   | 69      | 1.00E-05 | 305      | 1.00E-05  | 4362     | 0.197616  | 100.4988  | botany_bay     |
| bb8    | -34.0057 | 151.1988 | 2     | 69      | 1.00E-05 | 268      | 0.30597   | 3970     | 0.137028  | 50        | botany_bay     |
| bb9    | -34.0028 | 151.1944 | 3.5   | 26      | 2.461538 | 171      | 0.807018  | 3776     | 0.338983  | 0         | botany_bay     |
| jb1    | -35.0381 | 150.7862 | 2.1   | 37      | 1.189189 | 943      | 0.307529  | 1930     | 0.251813  | -10       | jervis_bay     |
| jb10   | -35.0391 | 150.7861 | 2.6   | 39      | 0.974359 | 924      | 0.324675  | 1997     | 0.24637   | 0         | jervis_bay     |
| jb11   | -35.0415 | 150.7846 | 3.2   | 34      | 0.823529 | 921      | 0.277959  | 2140     | 0.214953  | 0         | jervis_bay     |
| jb13   | -35.0397 | 150.7859 | 2.5   | 28      | 1.857143 | 915      | 0.301639  | 2093     | 0.242714  | 10        | jervis_bay     |
| jb14   | -35.0385 | 150.785  | 4.7   | 69      | 1.00E-05 | 1191     | 0.263644  | 2065     | 0.247942  | 80        | jervis_bay     |
| jb15   | -35.0405 | 150.7855 | 3.1   | 42      | 1.619048 | 873      | 0.293242  | 2127     | 0.22473   | 10        | jervis_bay     |
| jb18   | -35.039  | 150.7857 | 3.9   | 61      | 0.688525 | 1095     | 0.284932  | 2041     | 0.244978  | 22.36068  | jervis_bay     |
| jb19   | -35.0399 | 150.7863 | 1.6   | 15      | 2.4      | 706      | 0.371105  | 2024     | 0.244071  | -10       | jervis_bay     |
| jb2    | -35.0401 | 150.7859 | 2.3   | 21      | 2        | 778      | 0.326478  | 2084     | 0.234165  | 10        | jervis_bay     |
| jb3    | -35.0393 | 150.785  | 4.5   | 69      | 1.00E-05 | 1201     | 0.249792  | 2158     | 0.240037  | 67.08204  | jervis_bay     |
| jb5    | -35.0387 | 150.7864 | 1.5   | 22      | 1.272727 | 857      | 0.347725  | 1942     | 0.249228  | 0         | jervis_bay     |
| jb6    | -35.0405 | 150.7842 | 4.9   | 69      | 1.00E-05 | 1144     | 0.243007  | 2256     | 0.214539  | 100       | jervis_bay     |
| jb7    | -35.0409 | 150.7846 | 4     | 69      | 1.00E-05 | 1031     | 0.263822  | 2198     | 0.216561  | 44.72136  | jervis_bay     |
| jb8    | -35.0395 | 150.7862 | 1.8   | 12      | 2.666667 | 805      | 0.342857  | 2019     | 0.250619  | 0         | jervis_bay     |
| jb9    | -35.0411 | 150.7842 | 4.3   | 69      | 1.00E-05 | 1039     | 0.252166  | 2207     | 0.214771  | 53.85165  | jervis_bay     |
| lm1    | -33.0484 | 151.6441 | 3     | 43      | 1.116279 | 1016     | 0.311024  | 2728     | 0.31305   | 0         | lake_macquarie |
| lm10   | -33.0478 | 151.6461 | 2.6   | 68      | 0.558824 | 1168     | 0.246575  | 2691     | 0.25641   | 30        | lake_macquarie |

|        |          |          |     |    |          |      |          |      |          |                         |
|--------|----------|----------|-----|----|----------|------|----------|------|----------|-------------------------|
| lm11   | -33.0493 | 151.6469 | 1   | 68 | 0.558824 | 1177 | 0.188615 | 2692 | 0.255572 | 30 lake_macquarie       |
| lm12   | -33.0501 | 151.6473 | 0.7 | 3  | 2.666667 | 772  | 0.212435 | 2522 | 0.239492 | -40 lake_macquarie      |
| lm14   | -33.0483 | 151.6466 | 1.9 | 69 | 1.00E-05 | 1252 | 0.238019 | 2699 | 0.249722 | 94.33981 lake_macquarie |
| lm15   | -33.0492 | 151.6472 | 1.3 | 55 | 0.690909 | 1113 | 0.19407  | 2652 | 0.241327 | 10 lake_macquarie       |
| lm17   | -33.0495 | 151.6459 | 1.7 | 69 | 1.00E-05 | 1342 | 0.184799 | 2773 | 0.291381 | 82.46211 lake_macquarie |
| lm19   | -33.0492 | 151.6474 | 1   | 44 | 0.863636 | 1046 | 0.18738  | 2613 | 0.238041 | 0 lake_macquarie        |
| lm2    | -33.0487 | 151.6459 | 2.2 | 69 | 1.00E-05 | 1333 | 0.213053 | 2797 | 0.267429 | 100 lake_macquarie      |
| lm3    | -33.0489 | 151.6453 | 2.1 | 69 | 1.00E-05 | 1376 | 0.218023 | 2804 | 0.297432 | 82.46211 lake_macquarie |
| lm4    | -33.0494 | 151.6473 | 1   | 35 | 0.857143 | 1003 | 0.187438 | 2613 | 0.239571 | 0 lake_macquarie        |
| lm5    | -33.0482 | 151.645  | 3.3 | 53 | 0.981132 | 1123 | 0.26358  | 2761 | 0.27816  | 0 lake_macquarie        |
| lm7    | -33.0486 | 151.6471 | 1.5 | 69 | 1.00E-05 | 1198 | 0.227045 | 2653 | 0.242744 | 58.30952 lake_macquarie |
| lm8    | -33.0476 | 151.6446 | 3.2 | 1  | 4        | 770  | 0.350649 | 2646 | 0.273621 | -22.3607 lake_macquarie |
| lm9    | -33.0479 | 151.6446 | 3.5 | 13 | 2.923077 | 891  | 0.316498 | 2700 | 0.28     | -10 lake_macquarie      |
| pitt1  | -33.5908 | 151.3208 | 1.3 | 32 | 0.9375   | 931  | 0.186896 | 3743 | 0.117553 | 0 pittwater             |
| pitt11 | -33.5903 | 151.3188 | 1.4 | 69 | 1.00E-05 | 1847 | 0.109367 | 4801 | 0.122474 | 194.1649 pittwater      |
| pitt12 | -33.5921 | 151.3181 | 2   | 69 | 1.00E-05 | 1533 | 0.190476 | 3786 | 0.178024 | 120.4159 pittwater      |
| pitt14 | -33.5894 | 151.3175 | 1.9 | 69 | 1.00E-05 | 1887 | 0.122946 | 4833 | 0.112559 | 82.46211 pittwater      |
| pitt15 | -33.5911 | 151.3188 | 1.6 | 69 | 1.00E-05 | 1664 | 0.11899  | 4454 | 0.142344 | 141.4214 pittwater      |
| pitt16 | -33.5927 | 151.3188 | 1.7 | 65 | 0.584615 | 1244 | 0.205788 | 3414 | 0.204452 | 28.28427 pittwater      |
| pitt17 | -33.5889 | 151.3154 | 2.9 | 40 | 1.3      | 1023 | 0.218964 | 3557 | 0.131572 | 0 pittwater             |
| pitt20 | -33.5911 | 151.3163 | 2.1 | 69 | 1.00E-05 | 1370 | 0.218978 | 3937 | 0.150876 | 14.14214 pittwater      |
| pitt3  | -33.5893 | 151.3194 | 1.5 | 69 | 1.00E-05 | 1883 | 0.110462 | 5168 | 0.098684 | 202.4846 pittwater      |
| pitt4  | -33.5914 | 151.3205 | 1.3 | 39 | 0.871795 | 962  | 0.178794 | 3830 | 0.132637 | 0 pittwater             |
| pitt5  | -33.5892 | 151.3144 | 3.3 | 1  | 4        | 604  | 0.31457  | 2773 | 0.164443 | -40 pittwater           |
| pitt6  | -33.5884 | 151.3157 | 2.4 | 68 | 0.588235 | 1118 | 0.191413 | 3757 | 0.112856 | -40 pittwater           |
| pitt7  | -33.5898 | 151.3201 | 1.4 | 69 | 1.00E-05 | 1579 | 0.127929 | 4896 | 0.100899 | 120.4159 pittwater      |
| pitt8  | -33.5922 | 151.3174 | 1.8 | 69 | 1.00E-05 | 1574 | 0.212198 | 3635 | 0.182118 | 86.02325 pittwater      |
| pitt9  | -33.5903 | 151.3147 | 3.1 | 13 | 2.153846 | 694  | 0.32853  | 3242 | 0.160395 | -10 pittwater           |
| ps10   | -32.7174 | 152.1227 | 2.7 | 45 | 0.711111 | 254  | 0.488189 | 463  | 0.414687 | 10 port_stephens        |
| ps11   | -32.7188 | 152.128  | 1.4 | 58 | 0.62069  | 351  | 0.31339  | 499  | 0.352705 | 0 port_stephens         |
| ps12   | -32.7185 | 152.1262 | 1.1 | 29 | 1.103448 | 402  | 0.368159 | 600  | 0.37     | -10 port_stephens       |
| ps13   | -32.7176 | 152.1238 | 2   | 49 | 0.693878 | 289  | 0.477509 | 585  | 0.382906 | 10 port_stephens        |
| ps14   | -32.7176 | 152.122  | 1.1 | 39 | 0.820513 | 213  | 0.507042 | 398  | 0.442211 | 0 port_stephens         |
| ps15   | -32.7187 | 152.1279 | 1.5 | 63 | 0.603175 | 361  | 0.32687  | 505  | 0.352475 | 14.14214 port_stephens  |
| ps16   | -32.7177 | 152.1252 | 2.3 | 51 | 0.705882 | 337  | 0.41543  | 624  | 0.36859  | 20 port_stephens        |
| ps17   | -32.7177 | 152.1237 | 1.6 | 49 | 0.693878 | 290  | 0.489655 | 574  | 0.383275 | 10 port_stephens        |
| ps18   | -32.719  | 152.1287 | 1.4 | 53 | 0.716981 | 310  | 0.309677 | 464  | 0.349138 | 10 port_stephens        |
| ps19   | -32.7182 | 152.1268 | 1.5 | 69 | 1.00E-05 | 429  | 0.344988 | 576  | 0.364583 | 14.14214 port_stephens  |
| ps2    | -32.7175 | 152.123  | 1.8 | 48 | 0.708333 | 275  | 0.48     | 498  | 0.405622 | 20 port_stephens        |
| ps3    | -32.7179 | 152.1275 | 4.1 | 36 | 0.777778 | 393  | 0.3257   | 537  | 0.357542 | 0 port_stephens         |
| ps6    | -32.7177 | 152.1208 | 1   | 8  | 1.75     | 151  | 0.516556 | 299  | 0.481605 | -20 port_stephens       |
| ps7    | -32.718  | 152.1291 | 5.6 | 18 | 1.111111 | 295  | 0.305085 | 451  | 0.341463 | 10 port_stephens        |
| ps9    | -32.7175 | 152.124  | 4   | 32 | 0.875    | 290  | 0.475862 | 602  | 0.378738 | 0 port_stephens         |
| sgb1   | -35.1466 | 150.6296 | 1.5 | 42 | 1.095238 | 469  | 0.788913 | 768  | 0.760417 | 0 s_g_basin             |
| sgb10  | -35.1465 | 150.6294 | 1.7 | 31 | 1.225806 | 455  | 0.795604 | 775  | 0.75871  | 0 s_g_basin             |
| sgb12  | -35.1467 | 150.6286 | 1.2 | 41 | 0.878049 | 403  | 0.848635 | 782  | 0.7289   | 0 s_g_basin             |
| sgb13  | -35.1465 | 150.6284 | 2.5 | 19 | 1.157895 | 384  | 0.84375  | 779  | 0.744544 | 10 s_g_basin            |
| sgb15  | -35.1464 | 150.6295 | 1.6 | 13 | 2.153846 | 452  | 0.792035 | 774  | 0.75969  | 20 s_g_basin            |
| sgb16  | -35.1465 | 150.6288 | 1.8 | 25 | 1.36     | 411  | 0.856448 | 788  | 0.728426 | 10 s_g_basin            |
| sgb17  | -35.1465 | 150.6303 | 1.5 | 37 | 0.810811 | 479  | 0.776618 | 787  | 0.752224 | 0 s_g_basin             |
| sgb18  | -35.1465 | 150.6291 | 2.1 | 16 | 1.625    | 423  | 0.832151 | 783  | 0.738186 | 10 s_g_basin            |
| sgb2   | -35.1461 | 150.6306 | 3.7 | 12 | 1.666667 | 494  | 0.684211 | 800  | 0.7375   | -28.2843 s_g_basin      |
| sgb3   | -35.1466 | 150.6283 | 2.6 | 27 | 1.111111 | 380  | 0.836842 | 775  | 0.740645 | 0 s_g_basin             |
| sgb5   | -35.1466 | 150.6301 | 1.5 | 50 | 0.84     | 471  | 0.789809 | 775  | 0.753548 | 0 s_g_basin             |
| sgb6   | -35.1465 | 150.6298 | 1.5 | 37 | 1.189189 | 470  | 0.782979 | 774  | 0.757106 | 0 s_g_basin             |
| sgb7   | -35.1467 | 150.6292 | 1.5 | 36 | 1        | 435  | 0.818391 | 778  | 0.742931 | 10 s_g_basin            |
| sgb8   | -35.1462 | 150.631  | 2.2 | 30 | 1        | 501  | 0.654691 | 799  | 0.740926 | 0 s_g_basin             |
| sgb9   | -35.1463 | 150.6299 | 2.3 | 21 | 1.714286 | 466  | 0.7897   | 780  | 0.751282 | 14.14214 s_g_basin      |

**Table S3.** List of fish species observed in the videos, including species functional traits (feeding information).

| <b>Family</b>   | <b>Genus</b>          | <b>Species</b>         | <b>Feeding information</b> | <b>Source</b>                                                 |
|-----------------|-----------------------|------------------------|----------------------------|---------------------------------------------------------------|
| Ambassidae      | <i>Ambassis</i>       | sp                     | Carnivore                  | FishBase                                                      |
| Labridae        | <i>Thalassoma</i>     | <i>amblycephalum</i>   | Planktivore                | FishBase                                                      |
| Mugilidae       | <i>Liza</i>           | <i>argentea</i>        | Omnivore                   | DPI - Fisheries                                               |
| Sparidae        | <i>Chrysophrys</i>    | <i>auratus</i>         | Carnivore                  | FishBase                                                      |
| Sparidae        | <i>Acanthopagrus</i>  | <i>australis</i>       | Carnivore                  | FishBase                                                      |
| Monacanthidae   | <i>Nelussetta</i>     | <i>ayraud</i>          | Carnivore                  | FishBase                                                      |
| Labridae        | <i>Neodax</i>         | <i>balteatus</i>       | Carnivore                  | Fishes of Australia                                           |
| Clupeidae       | <i>Herklotichthys</i> | <i>castelnaui</i>      | Carnivore                  | FishBase                                                      |
| Monacanthidae   | <i>Monacanthus</i>    | <i>chinensis</i>       | Omnivore                   | FishBase                                                      |
| Sillaginidae    | <i>Sillago</i>        | <i>ciliata</i>         | Carnivore                  | FishBase                                                      |
| Perchichthyadae | <i>Perclates</i>      | <i>colonorum</i>       | Carnivore                  | FishBase                                                      |
| Trygonorrhinae  | <i>Trygonorrhina</i>  | <i>fasciata</i>        | Carnivore                  | Fishes of Australia                                           |
| Dasyatidae      | <i>Hemitrygon</i>     | <i>fluviorum</i>       | Carnivore                  | FishBase                                                      |
| Monacanthidae   | <i>Meuschenia</i>     | <i>freycineti</i>      | Omnivore                   | Truong et al. 2017 [124]                                      |
| Platycephalidae | <i>Platycephalus</i>  | <i>fuscus</i>          | Carnivore                  | FishBase                                                      |
| Belonidae       | <i>Tylosurus</i>      | <i>gavialoides</i>     | Carnivore                  | Manjakasy et al. 2009 [125]                                   |
| Carangidae      | <i>Pseudocaranx</i>   | <i>georgianus</i>      | Carnivore                  | Fishes of Australia                                           |
| Tetraodontidae  | <i>Tetractenos</i>    | <i>glaber</i>          | Omnivore                   | FishBase                                                      |
| Monacanthidae   | <i>Scobinichthys</i>  | <i>granulatus</i>      | Omnivore                   | FishBase                                                      |
| Labridae        | <i>Notolabrus</i>     | <i>gymnogenis</i>      | Carnivore                  | Fishes of Australia                                           |
| Monacanthidae   | <i>Brachaluteres</i>  | <i>jacksonianus</i>    | Omnivore                   | Truong et al. 2017 [124]                                      |
| Paralichthyidae | <i>Pseudorhombus</i>  | <i>jenynsii</i>        | Carnivore                  | FishBase                                                      |
| Dinolestidae    | <i>Dinolestes</i>     | <i>lewini</i>          | Carnivore                  | Truong et al. 2017 [124]                                      |
| Apogonidae      | <i>Ostorhinchus</i>   | <i>limenus</i>         | Carnivore                  | <a href="https://www.reeflex.net">https://www.reeflex.net</a> |
| Mullidae        | <i>Upeneichthys</i>   | <i>lineatus</i>        | Carnivore                  | FishBase                                                      |
| Kyphosidae      | <i>Scorpiis</i>       | <i>lineolata</i>       | Omnivore                   | H. Schilling, unpublished data                                |
| Blennidae       | <i>Petroscirtes</i>   | <i>lupus</i>           | Carnivore                  | Burchmore et al. 1984 [46]                                    |
| Plotosidae      | <i>Cnidoglanis</i>    | <i>macrocephalous</i>  | Omnivore                   | FishBase                                                      |
| Scatophagidae   | <i>Selenotoca</i>     | <i>multifasciata</i>   | Omnivore                   | Fishes of Australia                                           |
| Rhinopteridae   | <i>Rhinoptera</i>     | <i>neglecta</i>        | Planktivore                | Australian Museum                                             |
| Carangidae      | <i>Trachurus</i>      | <i>novaezealandiae</i> | Planktivore                | H. Schilling, unpublished data                                |
| Sphyraenidae    | <i>Sphyraena</i>      | <i>obtusata</i>        | Carnivore                  | FishBase                                                      |
| Diodontidae     | <i>Dicotylichthys</i> | <i>punctulatus</i>     | Carnivore                  | Australian Museum                                             |
| Anguillidae     | <i>Hyporhamphus</i>   | <i>reinhardtii</i>     | Omnivore                   | FishBase                                                      |
| Pomatomidae     | <i>Pomatomus</i>      | <i>saltatrix</i>       | Carnivore                  | FishBase                                                      |

|               |                       |                       |             |                                 |
|---------------|-----------------------|-----------------------|-------------|---------------------------------|
| Sparidae      | <i>Rhabdosargus</i>   | <i>sarba</i>          | Carnivore   | FishBase                        |
| Labridae      | <i>Haletta</i>        | <i>semifasciata</i>   | Omnivore    | FishBase                        |
| Pomacentridae | <i>Abudefduf</i>      | <i>sexfasciatus</i>   | Omnivore    | FishBase                        |
| Terapontidae  | <i>Pelates</i>        | <i>sexlineatus</i>    | Carnivore   | FishBase                        |
| Monacanthidae | <i>Acanthaluteres</i> | <i>spilomelanurus</i> | Omnivore    | FishBase                        |
| Mullidae      | <i>Parupeneus</i>     | <i>spilurus</i>       | Carnivore   | Truong et al. 2017 [124]        |
| Gobiidae      | <i>Gobiopterus</i>    | sp                    | Omnivore    | FishBase                        |
| Scorpididae   | <i>Atypichthys</i>    | <i>strigatus</i>      | Planktivore | Champion et al. 2015 [126]      |
| Gerreidae     | <i>Gerres</i>         | <i>subfasciatus</i>   | Carnivore   | FishBase                        |
| Urolophidae   | <i>Trygonoptera</i>   | <i>testacea</i>       | Carnivore   | FishBase                        |
| Monacanthidae | <i>Meuschenia</i>     | <i>trachylepis</i>    | Omnivore    | Truong et al. 2017 [124]        |
| Mullidae      | <i>Upeneus</i>        | <i>tragula</i>        | Carnivore   | FishBase                        |
| Girellidae    | <i>Girella</i>        | <i>tricuspidata</i>   | Herbivore   | FishBase                        |
| Arripidae     | <i>Arripis</i>        | <i>trutta</i>         | Carnivore   | FishBase                        |
| Monacanthidae | <i>Meuschenia</i>     | <i>venusta</i>        | Omnivore    | Based on <i>Meuschenia</i> spp. |
| Labridae      | <i>Achoerodus</i>     | <i>viridis</i>        | Carnivore   | Gillanders 1995 [29]            |
| Monacanthidae | <i>Acanthaluteres</i> | <i>vittiger</i>       | Herbivore   | FishBase                        |

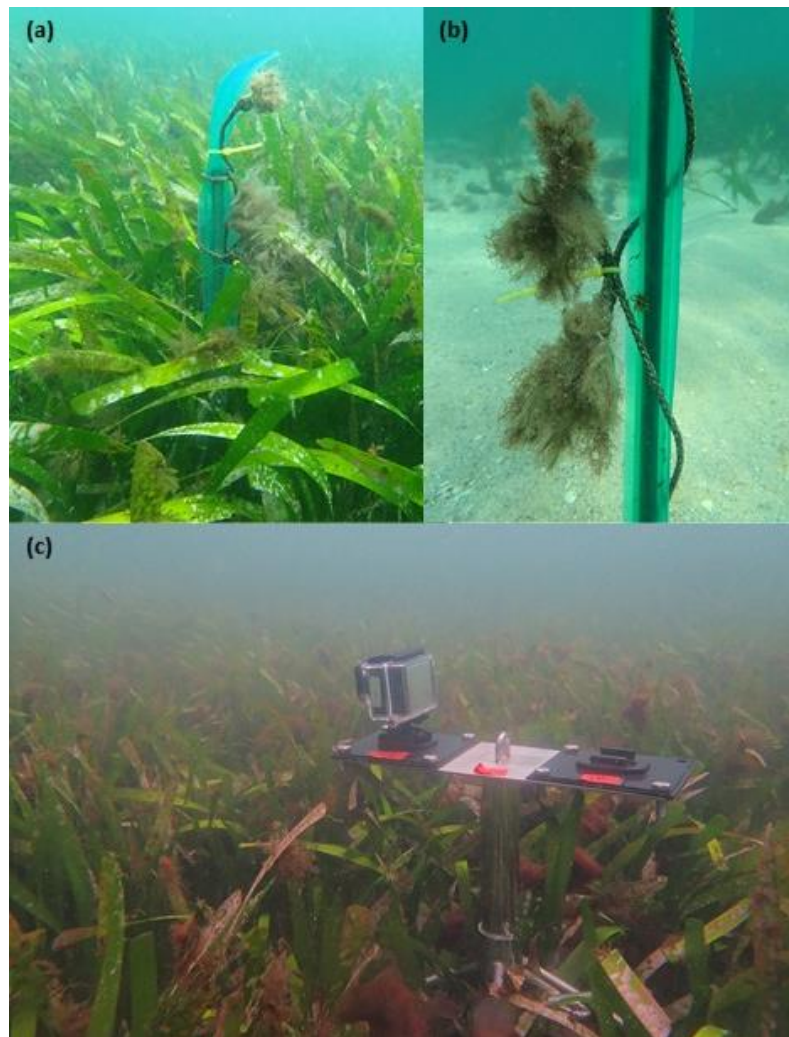

**Figure S1.** Example of (a) an artificial *Posidonia* unit in a seagrass patch and (b) in a bare area and (c) of a supra-canopy GoPro set up.

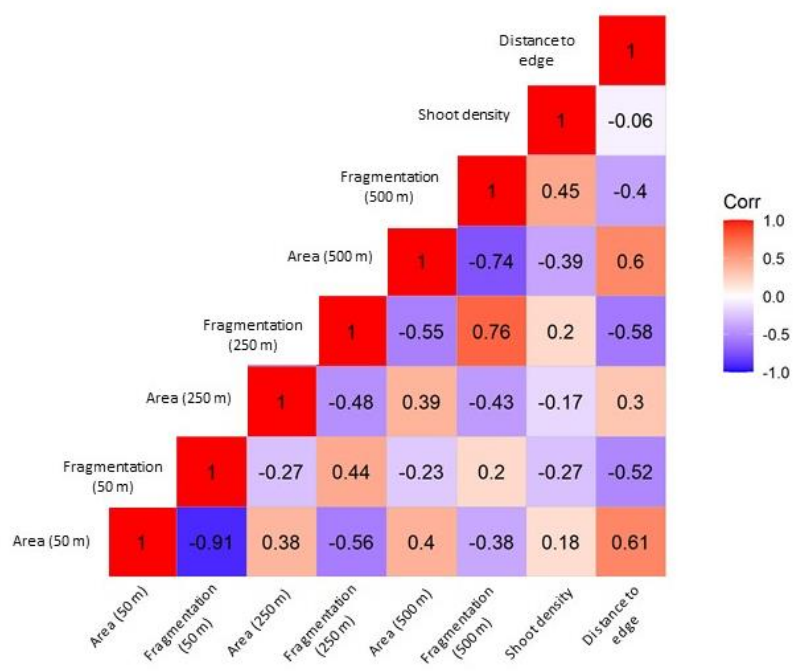

**Figure S2.** Correlation plots among variables: distance to patch edge, seagrass shoot density, area and level of fragmentation at 50 m, 250 m and 500 m of radius.
